# Supplementary material for: Methodological Issues in Antifungal Susceptibility Testing of Malassezia pachydermatis
Source: J Fungi (Basel). 2017 Jul 5;3(3):37. doi: 10.3390/jof3030037 (PMC5715951; doi:10.3390/jof3030037)
Supplement: Supplementary file 1 [file jof-03-00037-s001.xlsx]

## Sheet: MAIN PAGE
	CLICK HERE FOR LEGEND/EXPLANATIONS
	CLICK ON THE NAMES FOR STUDY DETAILS AND RESULTS
progressive number	Ref	country	ref. number in the manuscript	test format	n° of isolates tested	CBS 1879
1	Lorenzini et al. (1985)	Italy	48	Adiff	5
2	Gordon et al. (1988)	USA	44	BMD	7
3	Uchida et al. (1990)	Japan	61	BMaD	42	x
4	Schmidt (1997)	Germany	59	BMD	40
5	Kiss et al. (1997)	Hungary	47	Adiff	81	x
6	Bernardo et al. (1998)	Portugal	36	Adiff	unclear
7	Gupta et al. (2000)		45	AD	4	x
8	Nakamura et al. (2000)	Japan	51	BMD/AD	12
9	Coutinho & Paula (2001)	Brazil	41	E-test	30
10	Murai et al. (2002)	Japan	50	BMD	24	x
11	Weseler et al. (2002)	UK	65	BMD	9
12	Garau et al. (2003)	Spain	43	BMD	10
13	Nascente et al. (2003)	Brazil	19	BMD/E-test	44
14	Eichenberg et al. (2003)	Brazil	42	BMD	82
15	Velegraki et al. (2004)	Greece	62	BMD/ E-test	1
16	Rougier et al. (2005)	Belgium, France, Italy, Germany	20	Adiff	ND
17	Nakano et al. (2005)	Japan	52	BMD	51
18	Sugita et al. (2005)	Japan	60	AD	6
19	Rincon et al. (2006)	USA	58	BMD		x
20	Lyskova et al. (2007)	Czech Republic	49	Adiff	ND
21	Brito et al. (2007)	Brazil	38	AD	32
22	Prado et al. (2008)	Brazil	57	BMD	50
23	Pietschmann et al. (2008)		56	BMD	1	x
24	Brito et al. (2009)	Brazil	37	BMD	20
25	Hensel et al. (2009)	USA	46	BMD	24
26	Nascente et al. (2009)	Brazil	18	BMD	51
27	Nascente et al. (2009)	Brazil	53	BMD/E-test	17
28	Nijima et al. (2011)	Japan	54	BMD/E-test	30	x
29	Jesus et al. (2011)	Brazil	17	BMD	30
30	Cafarchia et al. (2012)	Italy	33	BMD	30
31	Cafarchia et al. (2012)	Italy	15	BMD	62
32	Cafarchia et al. (2012)	Italy	16	BMD/E-test	62
33	Peano et al. (2012)	Italy	34	BMD	51
34	Weiler et al. (2013)	Brazil	64	BMD	80
35	Watanabe et al. (2013)	Japan, Korea, Taiwan	63	E-test	182
36	Chiavassa et al. (2014)	Italy	40	BMD	42
37	Pasquetti et al. (2015)	Italy	55	Adiff / BMD	31	x
38	Cafarchia et al. (2015)	Italy	39	BMD	62
39	Alvarez Perez et al. (2016)	Spain	35	BMD	216

## Sheet: Legend-Explanations
BACK TO MAIN PAGE

## Sheet: Lorenzini et al. (1985) 48 
BACK TO MAIN PAGE
Lorenzini et al. 1985 [48]
N° of isolates of M. pachydermatis tested	5
source of isolates	dogs with otitis externa
COUNTRY	Italy
TEST FORMAT	A-diff
AGENTS TESTED	AMB CTZ ECZ KTZ MCZ NYS TBZ
MEDIUM	Sabouraud Dextrose Agar, Tween 80 1%, yeast extract 1.5%
INOCULUM	ND
Temperature of incubation (°C)	30
Length of incubation	48 h
Reading (Turbidimetric vs Colorimetric)	NA
Reading (Visual vs Spectrophotometric)	NA
MIC end-point definition	NA
	Size of inhibition zones
AMB	not clearly reported
CTZ	not clearly reported
ECZ	not clearly reported
KTZ	not clearly reported
MCZ	not clearly reported
NYS	not clearly reported
TBZ	not clearly reported

## Sheet: Gordon et al. (1988) 44 
BACK TO MAIN PAGE
Gordon et al. 1988 [44]
N° of isolates of M. pachydermatis tested	7
source of isolates	ND
COUNTRY	USA
TEST FORMAT	BMD
AGENTS TESTED	KTZ MCZ
MEDIUM	Supplemented Yeast nitrogen semisolid agar
INOCULUM	PD (turbidity corresponding to 85% transmittance at 530 nm)
Temperature of incubation (°C)	37
Length of incubation	48 h
Reading (Turbidimetric vs Colorimetric)	T
Reading (Visual vs Spectrophotometric)	V
MIC end-point definition	~100%
		Results (µg/ml)
		MIN MIC	MIC50	MIC90	MAX MIC		mean MIC	modal MIC	NOTES
	KTZ				0.002		0.002		all isolates same MIC
	MCZ	0.009			0.039		0.026		only range reported

## Sheet: Uchida et al. (1990) 61 
BACK TO MAIN PAGE
Uchida et al. 1990 [61]
N° of isolates of M. pachydermatis tested	42
source of isolates	40 dogs with otitis externa before treatment; 2 ref. (CBS 1879)
COUNTRY	Japan
TEST FORMAT	BMaD
AGENTS TESTED	CTZ KTZ MCZ NYS
MEDIUM	Sabouraud Dextrose Broth, Tween 80
INOCULUM	104
Temperature of incubation (°C)	37
Length of incubation	48 h
Reading (Turbidimetric vs Colorimetric)	T
Reading (Visual vs Spectrophotometric)	V
MIC end-point definition	ND
		Results ( µg/ml)
		MIN MIC	MIC50	MIC90	MAX MIC		mean MIC	modal MIC	NOTES	MIC for strain CBS 1879 (µg/ml)
	CTZ	0.16	1.25	5	20		nd	1.25		5
	KTZ	0.02	0.08	2.5	10		nd	0.02		1.25
	MCZ	0.16	1.25	20	> 80		nd	0.63	1 isolates without a MIC	2.5
	NYS	0.16	1.25	40	> 80		nd	1.25	3 isolates without a MIC	0.63

## Sheet: Schmidt (1997) 59 
BACK TO MAIN PAGE
Schmidt 1997 [59]
N° of isolates of M. pachydermatis tested	40
source of isolates	clinical isolates from canine ear swabs
COUNTRY	Germany
TEST FORMAT	BMD
AGENTS TESTED	CTZ
MEDIUM	Leeming-Notman Broth
INOCULUM	ND
Temperature of incubation (°C)	28
Length of incubation	48 h
Reading (Turbidimetric vs Colorimetric)	C (ox)
Reading (Visual vs Spectrophotometric)	V
MIC end-point definition	1
		Results (µg/ml)
		MIN MIC	MIC50	MIC90	MAX MIC		mean MIC	modal MIC	NOTES
	CTZ	<0.06	4	16	32		nd	0.5/16	bi-modal distribution

## Sheet: Kiss et al. (1997) 47 
BACK TO MAIN PAGE
Kiss et al. 1997 [47]
N° of isolates of M. pachydermatis tested	81
source of isolates	80 dogs with otitis externa; 1 ref. (CBS 1879)
COUNTRY	Hungary
TEST FORMAT	A-diff
AGENTS TESTED	CTZ ECZ MCZ KTZ NYS
MEDIUM	Casitone medium (Pasteur)
INOCULUM	ND
Temperature of incubation (°C)	37
Length of incubation	48 h
Reading (Turbidimetric vs Colorimetric)	NA
Reading (Visual vs Spectrophotometric)	NA
MIC end-point definition	NA
		Size of inhibition zones (mm)	standard deviation	coefficient of variation
	CTZ	40.10	5.42	13.53
	ECZ	50.53	9.30	18.41
	MCZ	37.38	7.54	20.18
	KTZ	72.75	4.44	6.10
	NYS	27.08	4.31	15.92

## Sheet: Bernardo et al. (1998) 36
BACK TO MAIN PAGE
Bernardo et al. 1998 [36]
N° of isolates of M. pachydermatis tested	unclear
source of isolates	dogs with otitis externa
COUNTRY	Portugal
TEST FORMAT	A-diff
AGENTS TESTED	AMB CTZ ECZ FCY MCZ KTZ NYS
MEDIUM	Casitone and Semisynthetic agar
INOCULUM	yeast suspension equivalent to 2 (McFarland scale)
Temperature of incubation (°C)	37
Length of incubation	72 h
Reading (Turbidimetric vs Colorimetric)	NA
Reading (Visual vs Spectrophotometric)	NA
MIC end-point definition	NA
		R to:
	5 isolates	NYS and FCY
	1 isolate	CTZ, NYS and FCY
	1 isolate	KTZ, NYS and FCY
	1 isolate	MCZ, NYS, FCY and AMB
	1 isolate	CTZ, MCZ, NYS, FCY and AMB
	1 isolate	CTZ, MCZ, NYS, KTZ, ECZ, FCY and AMB

## Sheet: Gupta et al. (2000) 45 
BACK TO MAIN PAGE
Gupta et al. 2000 [45]
N° of isolates of M. pachydermatis tested	4
source of isolates	all reference strains (including strain CBS1879)
COUNTRY
TEST FORMAT	AD
AGENTS TESTED	KTZ ITZ TER
MEDIUM	Sabouraud Dextrose Agar
INOCULUM	5 x 102 (final amount dispensed on the agar plate)
Temperature of incubation (°C)	35
Length of incubation	7 d
Reading (Turbidimetric vs Colorimetric)	NA
Reading (Visual vs Spectrophotometric)	NA
MIC end-point definition	> 80% (azoles); 100% (TER)
		Results (µg/ml)
		MIN MIC	MIC50	MIC90	MAX MIC		mean MIC	modal MIC	NOTES	MIC for strain CBS 1879 (µg/ml)
	KTZ				≤ 0.03				all strains same MIC	≤ 0.03
	ITZ				≤ 0.03				all strains same MIC	≤ 0.03
	TER				≤ 0.03				all strains same MIC	≤ 0.03
	VCZ	≤ 0.03			0.25

## Sheet: Nakamura et al. (2000) 51 
BACK TO MAIN PAGE
Nakamura et al. 2000 [51]
N° of isolates of M. pachydermatis tested	12
source of isolates	ND
COUNTRY	Japan
TEST FORMAT	BMD/AD
AGENTS TESTED	ITZ TER
	BMD	AD
MEDIUM	Christensen Urea Broth, Tween 40 0.5%, Tween 80 0.1%	Leeming-Notman Agar
INOCULUM	2.5 x 106 cells/ml	103 (final amount dispensed on the agar plate)
Temperature of incubation (°C)	30	30
Length of incubation	48 h	4 d
Reading (Turbidimetric vs Colorimetric)	C(u)	NA
Reading (Visual vs Spectrophotometric)	S	NA
MIC end-point definition	0.99	1
			Results (µg/ml)
			MIN MIC	MIC50	MIC90	MAX MIC		mean MIC	modal MIC	NOTES
		ITZ (BMD)	0.8			6.3		1.6		only range and mean MIC reported
		ITZ (AD)	0.4			6.3		3.2		only range and mean MIC reported
		TER (BMD)	3.2			25		6.3		only range and mean MIC reported
		TER (AD)	3.2			50		12.5		only range and mean MIC reported

[truncated: 31 more sheets: Coutinho and Paula (2001) 41 , Murai et al. (2002) 50, Weseler et al. (2002) 65, Garau et al. (2003) 43 , Nascente et al. (2003) 19, Eichenberg et al. (2003) 42 , Velegraki et al. (2004) 62, Rougier et al. (2005) 20 , Nakano et al. (2005) 52 , Sugita et al. (2005) 60 , Rincon et al. (2006) 58, Lyskova et al. (2007) 49, Brito et al. (2007) 38 , Prado et al. (2008) 57, Pietschmann et al. (2008) 56, Brito et al. (2009) 37 , Hensel et al. (2009) 46, Nascente et al. (2009) 18, Nascente et al. (2009) 53, Nijma et al. (2011) 54 …]
